# Supplementary material for: Neurochemical and Cognitive Beneficial Effects of Moderate Physical Activity and Catechin in Aged Rats
Source: MDPI journal article supplement (doi:10.3390/antiox10040621), 2021-04-19
Supplement: s1 [file s1]

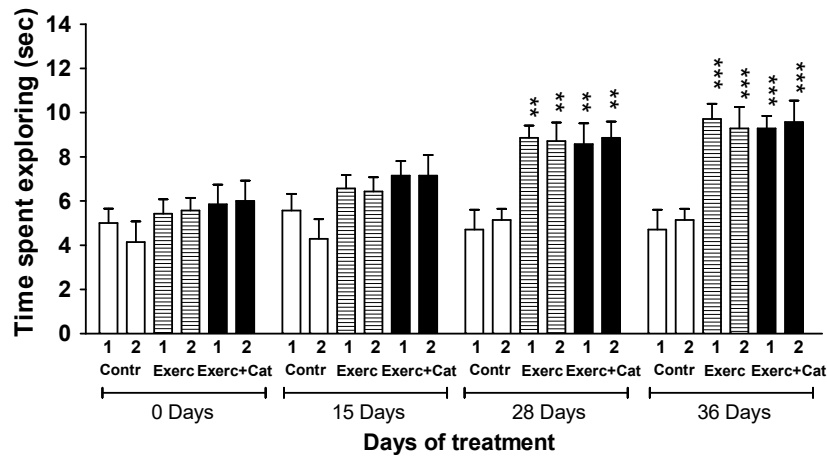

**Figure S1.** Effect of exercise and the combined action of exercise and catechin treatment on familiarization phase in the novel object recognition test in old rats. Bars represent the mean  $\pm$  SEM of the total time spent exploring each object (1, left object; 2, right object) of animals subjected to exercise (Exerc,  $n = 7$ ) and the exercise plus catechin treatment group (Exerc + Cat,  $n = 7$ ) respect to the control group ( $n = 7$ ).  $**p < 0.01$ ,  $***p < 0.001$  when compared to the control group.

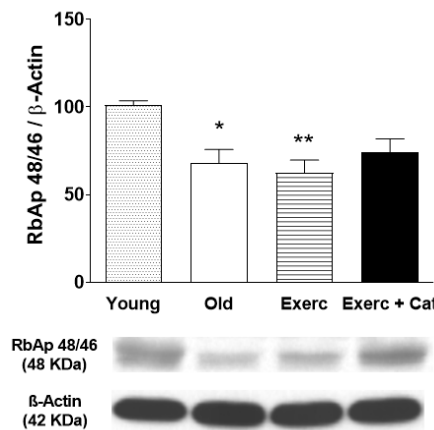

**Figure S2.** Effect of exercise and the combined action of exercise and catechin antioxidant treatment on RbAp 48/46 (48 kDa) protein expression in hippocampus of old rats. Bars represent mean  $\pm$  SEM of protein levels per group (animals subjected to exercise, Exerc,  $n=7$ ; exercise together with catechin, Exerc + Cat,  $n=7$ ; old control group, Old,  $n=6$ ) expressed as percentage relative to the young group ( $n=6$ ). Protein level was normalized to  $\beta$ -actin content and each sample was analyzed in three different membranes. One-way ANOVA detected a significant effect ( $F(3,22)=6.052$ ,  $p=0.0036$ ).  $*p<0.05$ ,  $**p<0.01$  when compared with young animals in the control group (one-way ANOVA, followed by Bonferroni test). A representative immunoblot of the changes obtained in RbAp 48/46, with no changes in  $\beta$ -actin (loading pattern), is shown below graph.
